1 **Pherotype polymorphism in *Streptococcus pneumoniae* and its effects on population structure**  
2 **and recombination**

3

4 Eric L. Miller<sup>1,2</sup>, Benjamin A. Evans<sup>1,3</sup>, Omar E. Cornejo<sup>4</sup>, Ian S. Roberts<sup>1§</sup> and Daniel E. Rozen<sup>1,2§</sup>

5

6 Affiliations:

7 <sup>1</sup>Faculty of Biology, Medicine, and Health, University of Manchester, Manchester, United

8 Kingdom

9 <sup>2</sup>Institute of Biology, Leiden University, Leiden, Netherlands

10 <sup>3</sup>Norwich Medical School, University of East Anglia, Norwich, United Kingdom

11 <sup>4</sup>School of Biological Sciences, Washington State University, Pullman, USA

12

13 § Corresponding authors: Ian S. Roberts

14 Oxford Road

15 Manchester M13 9PL

16 England, The United Kingdom

17 +44 161 275 7513

18 i.s.roberts@manchester.ac.uk

19

20 Daniel E. Rozen

21 Sylviusweg 72

22 2333 BE Leiden

23 The Netherlands

24 +31 (0) 71 527 7990

25 d.e.rozen@biology.leidenuniv.nl

26

27 Keywords: competence / pneumococcus / quorum sensing / balanced polymorphism / horizontal gene

28 transfer

29 **Abstract**

30 Natural transformation in the Gram-positive pathogen *Streptococcus pneumoniae* occurs when cells  
31 become “competent”, a state that is induced in response to high extracellular concentrations of a  
32 secreted peptide signal called CSP (Competence Stimulating Peptide) encoded by the *comC* locus.  
33 Two main CSP signal types (pherotypes) are known to dominate the pherotype diversity across strains.  
34 Using thousands of fully sequenced pneumococcal genomes, we confirm that pneumococcal  
35 populations are highly genetically structured and that there is significant variation among diverged  
36 populations in pherotype frequencies; most carry only a single pherotype. Moreover, we find that the  
37 relative frequencies of the two dominant pherotypes significantly vary within a small range across  
38 geographical sites. It has been variously proposed that pherotypes either promote genetic exchange  
39 among cells expressing the same pherotype, or conversely that they promote recombination between  
40 strains bearing different pherotypes. We distinguish these hypotheses using a bioinformatics approach  
41 by estimating recombination frequencies within and between pherotypes across 4,089 full genomes.  
42 Despite underlying population structure, we observe extensive recombination between populations;  
43 additionally, we found significantly higher rates of genetic exchange between strains expressing  
44 different pherotypes than among isolates carrying the same pherotype. Our results indicate that  
45 pherotypes do not restrict, and marginally facilitate, recombination between strains. Furthermore, our  
46 results suggest that the CSP balanced polymorphism does not causally underlie population  
47 differentiation. Therefore, when strains carrying different pherotypes encounter one another during co-  
48 colonization, genetic exchange can freely occur.

49

## 50 **Introduction**

51           The Gram-positive pathogen *Streptococcus pneumoniae* is responsible for up to 1 million  
52 deaths annually (O'Brien et al., 2009). *S. pneumoniae* is naturally transformable, and this ability to  
53 take up and recombine extracellular DNA across a broad size range, from 15 bp to 19 kb (Mostowy et  
54 al., 2014), is associated with the acquisition of antibiotic resistance genes and with capsular switching  
55 (Croucher et al., 2014a, 2014b, 2011). Transformation in *S. pneumoniae* occurs following the quorum-  
56 dependent induction of “competence”, which is regulated by the secretion and detection of  
57 Competence Stimulating Peptide (CSP), encoded by *comC* (Håvarstein et al., 2006; Pestova et al.,  
58 1996). There are several alleles for *comC* and the gene encoding its cognate receptor, *comD*, although  
59 the vast majority of isolates carry either of two dominant mature signals encoded by *comC*, i.e. Csp-1  
60 or Csp-2 (Evans and Rozen, 2013; Pozzi et al., 1996; Whatmore et al., 1999). Although these different  
61 allele combinations, referred to as pherotypes, are known to be mutually unresponsive, with isolates  
62 only responding to the CSP produced by isolates of their own pherotype (Iannelli et al., 2005), their  
63 role on the population structure of pneumococci remains unclear.

64           Two alternative hypotheses for the potential effects of multiple pherotypes on the population  
65 genetic structure of *S. pneumoniae* have been outlined. One hypothesis posits that because bacteria  
66 only bind and respond to their own CSP signal, pherotypes could ensure that bacteria only recombine  
67 with strains sharing the same pherotype, leading to a close association between pherotype and clonal  
68 structure (Håvarstein et al., 1997; Tortosa and Dubnau, 1999). In the second hypothesis, CSP-  
69 activated fratricide, whereby CSP-induced cells use secreted bacteriocins to kill uninduced cells, could  
70 alternatively facilitate recombination between strains with varying pherotypes. Importantly, this  
71 hypothesis assumes that strains of one pherotype preferentially kill strains of other pherotypes, after  
72 which the induced strains recombine with the DNA liberated from lysed cells (Claverys and  
73 Håvarstein, 2007; Claverys et al., 2006; Cornejo et al., 2010; Johnsborg et al., 2008). Although several  
74 recent studies have attempted to address the predictions of these models, results thus far are  
75 conflicting. While results from Carrolo et al. (Carrolo et al., 2014, 2009) support the idea that  
76 pherotypes facilitate within-pherotype recombination and therefore underlie population differentiation,  
77 results from Cornejo et al. (2010) are more consistent with the alternative. Importantly, the results of

78 these previous studies were limited to moderately small samples of strains, and analyses were  
79 performed on a limited number of markers (partial sequences of seven MLST loci), thereby reducing  
80 the ability to infer genomic-scale patterns of recombination. To overcome these limitations, our aim  
81 here is to address this question using a bioinformatics approach based upon analysis of recombination  
82 rates within and between phenotypes from 4,089 full pneumococcal genomes.

83

## 84 **Materials and Methods**

### 85 **Genomic data**

86 We obtained 4,089 *S. pneumoniae* genomes from five publicly available sets (Supplemental  
87 Table 1): 288 genomes from GenBank, which include 121 genomes of pathogenic strains from  
88 Atlanta, Georgia, The United States (Chancey et al., 2015); 3,017 genomes of carriage strains from  
89 Myanmar refugees in Maela, Thailand (Chewapreecha et al., 2014); 616 genomes of carriage strains  
90 from Massachusetts, the United States (Croucher et al., 2013a); 142 genomes of carriage strains from  
91 Rotterdam, the Netherlands (Bogaert et al., 2001; Miller et al., 2016); and 26 PMEN (Pneumococcal  
92 Molecular Epidemiology Network) genomes (McGee et al., 2001; Miller et al., 2016). These genomes  
93 were previously assembled and underwent quality control (Miller et al., 2016). We located *comC* and  
94 *comD* within these genomes using an iterative DNA reciprocal BLAST search as previously described  
95 (Miller et al., 2016). We excluded Rotterdam strain 724 and Maela strain 6983\_6#45 from all  
96 phenotype analyses because the genomes of both strains carry two complete *comC* alleles encoding for  
97 both Csp-1 and Csp-2.

98

### 99 **Phylogenetic analysis**

100 To reconstruct the phylogenetic relationships of *comD*, we aligned full-length alleles using  
101 MUSCLE 3.8.425 (Edgar, 2004) and Geneious 7.1.5 (Kearse et al., 2012). After deleting sites with 5%  
102 or more gaps, we inferred the GTR+I+ $\gamma$  substitution model using jModelTest 2.1.7 (Darriba et al.,  
103 2012). We used MrBayes 3.2 (Huelsenbeck and Ronquist, 2001; Ronquist and Huelsenbeck, 2003) for  
104 phylogenetic reconstruction across four independent runs.

105 The short length of *comC* prevented reconstructing the phylogenetic history with confidence;  
106 we instead used MUSCLE 3.8.425 (Edgar, 2004) and Geneious 7.1.5 (Kearse et al., 2012) to align  
107 amino acid variants and produce a UPGMA phylogram of amino acid identity.

108 In order to characterize the overall genetic population structure in *S. pneumoniae*, we used  
109 data from a previously reported full genome phylogenetic tree (Miller et al., 2016) based on alignment  
110 to strain R6\_uid57859 (Hoskins et al., 2001). In summary, we used genome sites found in at least  
111 99.5% of all the above *S. pneumoniae* genomes (1,444,122 sites) and used the single best maximum  
112 likelihood tree (ln(likelihood) of -3,2145,034.7) starting from fifteen unique random trees and from  
113 fifteen unique parsimonious trees, as calculated by RAxML v8.2.4 (Stamatakis, 2006) and ExaML  
114 v3.0 (Kozlov et al., 2015). This tree included 82 genomes from pneumococcus Complex 3 (Croucher  
115 et al. 2013) and 240 PMEN-1 genomes (Croucher et al., 2011); we excluded these strains from all of  
116 our analyses because they were originally sampled based on membership to clonal complexes and are  
117 therefore biased with respect to population structure and phenotype. 43 *Streptococcus sp. viridans*  
118 genomes were used as an outgroup for this tree, as previously reported (Miller et al., 2016).

119 For interspecific phylogenies, we identified *comC* and *comD* sequences from the available  
120 NCBI genomes for *S. infantis* (5 genomes), *S. mitis* (45 genomes), *S. oralis* (18 genomes), and *S.*  
121 *pseudopneumoniae* (40 genomes). The extensive sequence diversity in the mature CSP meant that we  
122 lacked confidence in aligning *comC*. Therefore, we used BAli-Phy v.2.3.6 (Suchard and Redelings,  
123 2006) for phylogenetic analysis because it estimates both the alignment and the tree simultaneously.  
124 We used the HKY+  $\gamma$  model of substitution and constrained the leader sequence of *comC* to align  
125 together; BAli-Phy then estimated the full *comC* alignment and tree across eight independent runs  
126 using the S07 model of indel mutations.

127 Using MUSCLE 3.8.425 (Edgar, 2004) and Geneious 7.1.5 (Kearse et al., 2012), we aligned  
128 the full-length *comD* sequences and deleted sites with more than 5% gaps. For further analysis, we  
129 used the filtered polymorphic sites from Gubbins (Croucher et al., 2015); any regions in individual  
130 sequences with evidence of recombination from Gubbins were replaced with N's. We used a GTR +  $\gamma$   
131 model of nucleotide substitution as determined by jModelTest 2.1.7 (Darriba et al., 2012) to  
132 reconstruct the phylogeny using MrBayes 3.2 across four independent runs.

133

### 134 **Shannon Diversity**

135 We located *comC* from 4 of 5 *S. infantis* genomes, 42 of 45 *S. mitis* genomes, all 18 *S. oralis*  
136 genomes, 39 of 40 *S. pseudopneumoniae* genomes, and 4,076 of 4,089 *S. pneumoniae* genomes. *comD*  
137 was also located in 4,040 *S. pneumoniae* genomes and from all other genomes except one *S. oralis*  
138 genome. We calculated Shannon diversity within each species based on amino acid identity across the  
139 entire gene. As each species had a different number of genomes, we calculated the Shannon diversity  
140 based on sub-sampling of 18 genomes for *comC* and 17 genomes for *comD*, corresponding to the  
141 minimum number of genomes in any species containing these genes, and we report the average of  
142 1000 samples.

143

### 144 **Estimating population structure**

145 We used hierBAPS (Cheng et al., 2013) on the full genome (2,038,615 bp) alignment to strain  
146 R6\_uid57859 (Hoskins et al., 2001) in order to examine population structure. We used one run of 50,  
147 60, 70, 80, 90, and 100 populations and four runs of 40 populations as upper bounds for the number of  
148 populations with between 2 and 4 levels of division. We found a constant number of 29-31  
149 populations at the first level of division, and we used the aggregate of all runs at this level to divide  
150 genomes into populations for further analysis. We confirmed the inferred population structure using an  
151 orthogonal metric; for this, we measured nucleotide diversity across the entire genome by dividing the  
152 number of identical, non-gapped sites by the total number of non-gapped sites for pairwise  
153 combinations of genomes using Python 2.7.8. We then compared average nucleotide diversity between  
154 and within populations.

155

### 156 **Recombination events**

157 We calculated the expected frequency of within- and between-phenotype recombination by  
158 assuming the null hypothesis that genetic exchange occurs randomly between phenotypes as a function  
159 of their respective frequencies. Accordingly, if  $i$  represents the frequency of strains producing Csp-1,

160 the expected within Csp-1 recombination rate is  $i^2$ . It then follows that the expected fraction of all  
161 recombination events that involve Csp-1 that occur strictly within-pherotype is

$$\frac{i^2}{i^2 + 2i(1 - i)}$$

162 which reduces to:

$$\frac{i^2}{2i - i^2}$$

163 Similarly, the expected rate of between-pherotype recombination is  $2ij$ , where  $i$  and  $j$  represent the  
164 frequencies of the focal pherotypes.

165 We used GeneConv 1.81a (Sawyer, 1999) to detect recombination events of at least 100 bp  
166 between all pairwise comparisons of the 4,089 genomes; briefly, this program detects continuous  
167 sections of DNA in pairwise alignments that have higher identity than the surrounding regions after  
168 accounting for monomorphic sites. We analysed the genomes as ‘circular’, used Holm-Bonferroni  
169 correction for multiple testing (Holm, 1979), and used a Gscale constant of 2, which scales to the  
170 number of mismatches allowed while detecting recombination events.

171 We next calculated the fraction of observed recombination events relative to each pherotype.  
172 By dividing the observed recombination frequencies by the expected recombination frequencies and  
173 natural-log transforming this ratio, we derived an intuitive scaling: values greater than 0 indicate that  
174 there is more recombination than expected by chance, while values less than 0 indicate the opposite.  
175 We used the PropCIs package in R (R Core Team, 2013) to estimate 95% confidence intervals for this  
176 ratio, and we tested if the observed recombination frequency differed significantly from the expected  
177 recombination frequency using Pearson’s  $\chi^2$  statistic using R (R Core Team, 2013). We additionally  
178 calculated observed and expected recombination frequencies by classifying strains by populations in  
179 place of pherotype.

180 To examine within and between pherotype recombination in more detail, we characterized the  
181 unique recombination events occurring between strains carrying the two dominant pherotypes (Csp-1  
182 and Csp-2), which together comprise 95.5% of strains. By highlighting unique recombination events,  
183 the aim of this analysis was to remove the potentially biasing influence of vertical transmission, which

184 could cause more ancient recombination events to be overrepresented compared to newer events. In  
185 order to identify unique recombination events, we grouped events that shared an identical start and end  
186 position in the full genome alignment. Next, we calculated the average proportion of these unique  
187 recombination events taking place between strains with Csp-1 and Csp-2 for each group. We  
188 examined a range of cut-off points for the minimum proportion of strains that must be involved in  
189 each grouped recombination event, including: 0.05% of strains ( $\geq 2$  strains, 1,663,312 events); 0.1% of  
190 strains ( $\geq 4$  strains, 1,156,428 events); 0.5% of strains ( $\geq 20$  strains, 381,084 events), 1.0% of strains  
191 ( $\geq 41$  strains, 197,740 events), 2.5% of strains ( $\geq 102$  strains, 59,980 events), and 5.0% of strains ( $\geq 204$   
192 strains, 19,428 events); this gradually focused the analysis on ancient recombination events. The  
193 expected proportion of between Csp-1 and Csp-2 recombination events was calculated as the expected  
194 encounter frequencies when only considering these two phenotypes, that is:

$$2 * \frac{i}{(i+j)} * \frac{j}{(i+j)}$$

195 where  $i$  and  $j$  are the frequencies of Csp-1 and Csp-2, respectively.

196

## 197 **Results**

### 198 ***comC* and *comD* diversity across *S. pneumoniae* genomes and geographic sites**

199 We estimated phenotype frequencies from 4,089 *S. pneumoniae* genomes that include  
200 extensive sampling in four geographic sites (Table 1). The global population is dominated by two  
201 phenotypes (the mature signals encoded by the *comC* gene): Csp-1 (72.0% of strains) and Csp-2  
202 (23.5% of strains). We also identified a novel variant in 2.1% of strains designated Csp-1\_Short,  
203 which is identical to Csp-1 but with the final 4 residues deleted. Three other related variants contain  
204 between 1 and 3 “NFF” amino acid repeats, which we designate Csp-4\_R1, Csp-4\_R2, and Csp-4\_R3,  
205 respectively. Note that Csp-4\_R2 has previously been labelled Csp-4 while Csp-4\_R3 is also called  
206 Csp-3 (Whatmore et al., 1999). 0.27% of strains contained no *comC* sequence, which may result from  
207 incomplete genome sequencing; the low fraction of genomes without a *comC* sequence indicates  
208 strong selection against phenotypes that do not produce CSP. The overall frequency ratio of Csp-  
209 1::Csp-2 in previous studies was approximately 73.7%::26.3% after minority phenotypes were



210 removed (Carrolo et al 2009, Carrolo et al 2014, Cornejo et al 2010, Pozzi et al 1996, Vestrheim et al  
211 2011); this is similar to the overall 75.4%::24.6% frequency ratio that we report after examining only  
212 Csp-1 and Csp-2 (Table 1). However, we found significant differences in Csp-1::Csp-2 frequency  
213 ratios between strains isolated from different geographic sites (Table 1), whose Csp-1 frequency ratios  
214 range from 77.6% to 65.9%. The Maela strains are significantly different from the Massachusetts and  
215 Rotterdam strains ( $p = 2.14 \times 10^{-9}$  and  $p = 1.46 \times 10^{-8}$  respectively, two-sample proportion test) but not  
216 significantly different from the Atlanta strains ( $p = 0.527$ , two-sample proportion test). The Atlanta  
217 strains are significantly different from the Massachusetts strains ( $p = 0.0351$ , two-sample proportion  
218 test), with both of these sets not significantly different from the Rotterdam strains ( $p = 0.193$  and  $p =$   
219  $1.00$  respectively, two-sample proportion test).

220 The polymorphism in CSP is mirrored in the histidine kinase receptor for CSP, *comD*. We  
221 found excellent concordance between the phenotype each strain carries and its corresponding *comD*  
222 sequence (Figure 1). 935 of 936 strains with Csp-2 and full-length *comD* alleles contained *comD*  
223 alleles within a well-supported clade (posterior probability (PP) = 1.00) distinct from the other  
224 common (> 0.2% occurrence) phenotypes. Similarly, all *comD* alleles found with Csp-4 variants  
225 cluster in a well-supported (PP = 1.00) clade, with Csp-1 strains then forming a paraphyletic group  
226 with their *comD* alleles. The Csp-1 paraphyletic group also contains *comD* alleles associated with Csp-  
227 1\_Short, which suggests this CSP may bind to the ComD receptor similarly to Csp-1. This supports  
228 tight functional linkage within three groups of phenotypes and ComD histidine kinases: Csp-1 (which  
229 includes Csp-1\_Short), Csp-2, and the Csp-4 derivatives.

230 Interspecific gene trees of the signal gene *comC* (Supplementary Figure 1) lacked support for  
231 most interspecific clades. *comC* variants do not strictly cluster by species and Csp-4 derivatives form a  
232 clade with other non-pneumoniae *Streptococcus*, which could be indicative of: i) horizontal transfer,  
233 which is not uncommon among related *Streptococcus* species (Balsalobre et al., 2003; Duesberg et al.,  
234 2008; King et al., 2005); or ii) the possibility that trans-specific polymorphism is maintained in this  
235 locus as a balanced polymorphism (Gao et al., 2015; Ségurel et al., 2013). This second explanation is  
236 unlikely for *S. pneumoniae* given that 115 of 118 *S. pneumoniae* alleles form a well-supported clade  
237 that excludes other species in the interspecific *comD* phylogenetic tree of the histidine kinase receptor

238 gene, in which we attempted to remove intragenic horizontal recombination (Supplementary Figure 2).  
239 By contrast, *S. mitis* and *S. pseudopneumoniae* freely intermix in all other clades, which is a pattern  
240 that supports trans-specific polymorphism between these two species. Shannon diversity of amino acid  
241 variants is lowest in *S. pneumoniae* compared to *S. mitis*, *S. oralis*, and *S. pseudopneumoniae* for  
242 ComC (0.75 compared to 1.89-2.70), the mature CSP (0.67 compared to 1.17-2.63), and ComD (1.51  
243 compared to 2.66-2.78) (Supplementary Table 2). While diversity in *S. pneumoniae* is a product of the  
244 Csp-1:Csp-2 polymorphism, other viridians-group species appear to maintain higher diversity through  
245 a larger repertoire of CSP signal molecules (Supplementary Figure 1).

246

### 247 **Pherotype and population structure**

248 We inferred the population structure of these strains using 10 independent hierBAPS runs with  
249 a full-genome alignment (Cheng et al. 2013; Figure 2); 23 of the resultant populations were invariant  
250 across all runs. The remaining genomes were assigned to one of 17 populations that each contained 21  
251 genomes or more (0.5% of the total number of genomes) that co-occurred in all ten runs. 118 genomes  
252 (2.7%) could not be consistently classified into populations. Overall, this resulted in 40 estimated  
253 populations alongside the unclassified genomes. 25% of populations were not monophyletic on the  
254 full-genome phylogenetic tree, which is surprising but consistent with previous analysis of  
255 pneumococcal populations (Figure 2; Chewapreecha et al., 2014; Croucher et al., 2013b). Consistent  
256 with the hierBAPS analysis, we estimated less genome nucleotide diversity within a population than  
257 between populations for 39 out of 40 populations (mean of per-within population nucleotide diversity  
258 = 0.00404; mean of per-between population nucleotide diversity = 0.0111;  $p < 1.2 \times 10^{-57}$  except for  
259 population 1,  $p = 0.059$ ; corrected Wilcox test). Pherotypes are not equally distributed across  
260 populations (Figure 3A), with 20 populations fixed for a single pherotype. Similarly, geography has an  
261 unsurprising effect on population structure, as 16 of the 40 populations consist solely of strains  
262 collected in Maela, Thailand (Supplementary Table 3).

263

### 264 **Recombination Events**

265 To examine within versus between pherotype recombination frequencies, we compared the  
266 observed fraction of recombination events to the expected fraction of recombination events that  
267 assumes strains recombine randomly. Overall, we found no evidence that recombination is limited  
268 between populations. While populations 9 and 21 had significantly more within-population  
269 recombination events than expected (Figure 3B), 37 other populations had significantly less within-  
270 population recombination events than expected ( $p \leq 1.09 \times 10^{-6}$  except for population 1,  $p = 0.395$ ;  
271 Newcombe proportion test with Holm-Bonferroni correction). The phenotypic diversity of populations,  
272 as estimated by Shannon diversity, created an interesting pattern with the proportion of observed  
273 between-population recombination events (Figure 3C), although a linear relationship is not statistically  
274 significant (Spearman's rank correlation  $\rho = 0.254$ ,  $p = 0.280$  after removing populations with  
275 Shannon diversity = 0).

276 Figure 4 shows estimates of recombination for all common ( $> 0.2\%$  of strains) pherotype  
277 combinations, with all observed recombination frequencies differing significantly from those expected  
278 ( $p < 4.9 \times 10^{-6}$ ; Newcombe proportion test with Holm-Bonferroni correction; Figure 4A). Of the 30  
279 between-pherotype comparisons, 15 estimates of recombination frequencies were significantly higher  
280 than expected, and 15 estimates were observed significant less frequently than expected. Importantly,  
281 we found a higher observed recombination frequency than expected between strains expressing the  
282 two dominant pherotypes Csp-1 and Csp-2 ( $p < 10^{-99}$ ; Newcombe proportion test with Holm-  
283 Bonferroni correction). In total, recombination between these two pherotypes comprises 34.7% of all  
284 recorded recombination events; thus an excess of recombination for these pairs implies that the  
285 general role of pherotypes is to marginally increase between-pherotype recombination rates. Five of  
286 the six within-pherotype observed recombination frequencies are lower than expected, with Csp-4\_R2  
287 as the only exception (Figure 4A); three of these frequencies are the lowest of all pherotype  
288 combinations within their respective pherotype.

289 A potential caveat of these results is that we consider every pairwise recombination event as  
290 independent. However, recombination events could have occurred at any time during the ancestry of  
291 these strains and then persisted via vertical descent, which may lead to biased estimates of  
292 recombination frequencies if a single, historic recombination event is counted in each of the multiple

293 strains that descended from their common ancestor. As the true number of recombination events  
294 through history is unknown, we considered the opposite extreme, in which pairwise recombination  
295 events with identical start and end positions in the full-genome alignment originated from a single  
296 recombination event. We focused only on Csp-1 and Csp-2 phenotypes, and we considered unique  
297 recombination events found in a range of at least 0.05% of genomes ( $\geq 2$  genomes) to at least 5.0% of  
298 genomes ( $\geq 204$  genomes) in order to focus on more ancient recombination events (Figure 4B). The  
299 mean proportion of between Csp-1::Csp-2 events of five out of six distributions are significantly  
300 different than a null expectation based on phenotype frequencies in the global population ( $p < 0.0253$ ;  
301 Wilcox test for difference to  $\mu = 0.371$ ); however, no values differ by more than 4.0% from the null  
302 expectation of 0.371, with three averages significantly above and two averages significantly below the  
303 null value. This result indicates that any potential bias introduced by considering all recombination  
304 events independently is, at most, marginal.

305

## 306 **Discussion**

307 Several studies, including this one, have found that the two dominant phenotypes of the  
308 quorum-dependent regulator of competence in *S. pneumoniae* (i.e. Csp-1 and Csp-2) are maintained at  
309 relative frequencies of roughly 70:30 (Carrolo et al 2014; Vestrheim et al 2011; Cornejo et al 2010;  
310 Carrolo et al 2009; Pozzi et al 1996). Our results also indicate that there is subtle geographic variation  
311 in the ratio of these dominant phenotypes, ranging from 66:34 to 78:22 (Table 1). These results  
312 naturally lead to questions of how this phenotype ratio is maintained (to the near exclusion of other  
313 phenotypes), especially at similar, yet not identical, levels in disparate geographic sites. The null  
314 explanation is that phenotypes are neutral with respect to bacterial fitness, although three lines of  
315 evidence counter this explanation. First, other studies suggest that *comC* is evolving under positive  
316 selection (Cornejo et al 2010; Carrolo et al 2009). Second, other *Streptococcus viridans* species have a  
317 higher diversity in CSP, ComC, and ComD; this diversity is caused by a large number of phenotypes  
318 within each species as opposed to the two dominant phenotypes in *S. pneumoniae*. Third, each  
319 geographic site is comprised of strains from anywhere between 14 and 36 different populations

320 (Supplemental Table 3), yet each site maintains the approximate 70:30 ratio of major phenotypes. This  
321 inter-population pattern between geographic sites is unlikely to occur through neutral mechanisms.

322 Irrespective of the factors maintaining phenotype polymorphism, what are the consequences of  
323 their maintenance for pneumococcal populations? Two divergent hypotheses have been explored to  
324 answer this question. One holds that these variants reinforce population subdivision by restricting  
325 recombination to strains that carry the same phenotype (Carrolo et al 2009). The alternative hypothesis  
326 suggests that lysis of non-identical phenotypes by the process of fratricide leads to inter-phenotype  
327 transformation and therefore the elimination of phenotype-specific population structuring (Cornejo et  
328 al 2010). Our data, based on the analysis of recombination from more than 4,000 full genome  
329 sequences, are not clearly consistent with the extreme version of either hypothesis. We find a slight  
330 tendency towards increased between-phenotype recombination for the dominant phenotype classes  
331 (Csp-1 and Csp-2; Figure 4A), and these results clarify that phenotypes are not a barrier to  
332 recombination in this species. However, these data are not without limits, in particular the difficulty of  
333 inferring recombination among closely related strains, which could partly explain the lower  
334 frequencies of within-phenotype (Figure 4A) or within-population (Figure 3B) recombination. Because  
335 this should only have minimal influence on estimates of between-phenotype recombination  
336 frequencies, as strains carrying different phenotypes tend to come from different populations (Figure  
337 3B), we do not view this as a bias that is likely to influence our conclusions.

338 *S. pneumoniae* live in surface-associated biofilm communities, where in the case of single-  
339 strain colonization, they will be surrounded by clone-mates. If some of these cells become competent  
340 and lyse the others via competence-induced fratricide (i.e. induced production of bacteriocins that  
341 target uninduced cells), there will be little signature of this event at the genomic level. However, it is  
342 increasingly clear that multiple-strain infections are more common than previously thought; co-  
343 colonization within the nasopharynx is observed in up to 50% of individuals (Wyllie et al 2014;  
344 Rodrigues et al 2013), and because rare variants are less likely to be detected during sampling, this  
345 may be an underestimate of the true occurrence of co-colonisation. In these cases, there is opportunity  
346 for genetic exchange between different genotypes. If the co-infecting genotypes express the same  
347 phenotype, both will respond to the same peptide signal and both genotypes could, in principle, release

348 DNA that will be available to the other. However, if the genotypes express different phenotypes, then  
349 the genotype that first initiates competence may lyse the other non-responding genotype via  
350 competence-induced fratricide, leading to more unidirectional uptake. While recombination during  
351 single phenotype infections could reinforce any pre-existing association between phenotype and  
352 population structure, recombination during mixed-phenotype infections would cause this association to  
353 decline or disappear. Our results are most consistent with this latter scenario.

354 How often do mixed phenotype colonization events occur? If the likelihood of colonization is  
355 random with respect to phenotype, then the probability that both phenotypes will be found to co-occur  
356 is simply twice the product of these relative frequencies. In two recent studies where this has been  
357 measured, mixed phenotype infections are common in cases where multiple strains are seen (47.5%  
358 and 57.1% in strains from Portugal and Norway, respectively) and do not vary from the null  
359 expectation of random colonization (Valente et al 2012, Vestrheim et al 2011). These results have  
360 several important implications. First, they suggest that fratricide during the induction to competence  
361 has minimal, if any, impact on the within-host competitive dynamics of co-occurring strains. Second,  
362 they suggest that opportunities for recombination between strains expressing different phenotypes are  
363 widespread. Accordingly, we would predict phenotypes to have little direct influence on population  
364 structure, a prediction borne out by the results presented here and elsewhere (Figure 3A; Cornejo et al  
365 2010). This, of course, does not preclude structure arising from other influences, e.g. serotype specific  
366 immunity, differences in antibiotic resistance or other attributes leading to biases in colonization.  
367 However, phenotypes neither appear to underlie this structure nor to eliminate it due to ubiquitous  
368 inter-phenotype recombination (Figure 4A).

369 A final explanation for a fixed phenotype ratio is that diversity is maintained for reasons  
370 wholly distinct from their effects on competence. In addition to competence, CSP induces more than  
371 150 pneumococcal genes, and only a small fraction of these are required for DNA uptake and  
372 recombination (Peterson et al 2004; Peterson et al 2000). Different concentrations of CSP are required  
373 for competence activation between Csp-1 and Csp-2 with their respective receptors (Carrolo et al.,  
374 2014; Iannelli et al., 2005), which determine the population density at which CSP induces these genes  
375 and could drive large phenotypic differences between phenotype based only on *comC* and *comD*

376 variation. We were unsuccessful in finding genomic loci that co-associates with CSP via selection  
377 using a genome-wide association study with pherotype as a phenotype, which suggests that any  
378 ecological differentiation between phenotype may be caused only by differences in *comC* and *comD*.  
379 However, Carolo et al. (2014) find striking differences in the ability for strains expressing Csp-1 and  
380 Csp-2 to form biofilms, with Csp-1 strains producing biofilms with greater biomass. Although the  
381 authors suggest that this difference may lead to differences in the colonization success and  
382 transmissibility of isolates, epidemiological data discussed above are not consistent with this  
383 possibility; co-colonization with multiple pherotypes occurs as often as expected by chance (Valente  
384 et al 2012, Vestrheim et al 2011). An alternative, which could lead to a form of balancing or  
385 frequency-dependent selection maintaining pherotypes at intermediate frequencies, is the possibility  
386 that differences in biofilm-associated biomass that influence stable colonization may trade-off with  
387 reductions in transmissibility. By this scenario, Csp-1-expressing strains may form more robust  
388 biofilms during colonization, while strains expressing Csp-2 are more proficient at dispersal. Although  
389 testing these possibilities is beyond the scope of this work, these ideas can potentially be examined  
390 empirically in both *in vivo* or *in vitro* models. Furthermore, they make the prediction that carriage  
391 duration should vary as a function of pherotype, a possibility that could potentially be retrospectively  
392 examined from epidemiological studies.

393         Although our results are unable to clarify the evolutionary factors that lead to the origin and  
394 maintenance of pherotypes in *S. pneumoniae*, our comprehensive analysis demonstrates the long-term  
395 effects of this polymorphism on recombination in this species. In summary, while pherotypes can  
396 apparently facilitate recombination between the major pherotype classes, this effect is weak and has no  
397 evident impact on population structure of this pathogen. Explanations for pneumococcal population  
398 structure therefore lie outside of pherotypes, and indeed, explanations for pherotypes may lie outside  
399 of their effects on recombination.

400

#### 401 **Acknowledgements**

402 Bioinformatic work was carried out on the Dutch national e-infrastructure with the support of SURF  
403 Foundation. This work made use of the facilities of N8 HPC Centre of Excellence, provided and

404 funded by the N8 consortium and the Engineering and Physical Sciences Research Council (grant  
405 number EP/K000225/1). The Centre is co-ordinated by the Universities of Leeds and Manchester. This  
406 work was supported by the Biotechnology and Biological Sciences Research Council (grant number  
407 BB/J006009/1) to DER and ISR and by the Wellcome Trust (105610/Z/14/Z) to the University of  
408 Manchester.  
409



410 **References**

- 411 Balsalobre, L., Ferrandiz, M.J., Linares, J., Tubau, F., de la Campa, A.G., 2003. Viridans group  
412 streptococci are donors in horizontal transfer of topoisomerase IV genes to *Streptococcus*  
413 *pneumoniae*. Antimicrob. Agents Chemother. 47, 2072–2081. doi:10.1128/aac.47.7.2072-  
414 2081.2003
- 415 Bogaert, D., Engelen, M.N., Timmers-Reker, A.J.M., Elzenaar, K.P., Peerbooms, P.G.H., Coutinho,  
416 R.A., De Groot, R., Hermans, P.W.M., 2001. Pneumococcal carriage in children in the  
417 Netherlands: A molecular epidemiological study. J. Clin. Microbiol. 39, 3316–3320.  
418 doi:10.1128/JCM.39.9.3316-3320.2001
- 419 Carrolo, M., Pinto, F.R., Melo-Cristino, J., Ramirez, M., 2014. Pherotype influences biofilm growth  
420 and recombination in *Streptococcus pneumoniae*. PLoS One 9, e92138.  
421 doi:10.1371/journal.pone.0092138
- 422 Carrolo, M., Pinto, F.R., Melo-Cristino, J., Ramirez, M., 2009. Pherotypes are driving genetic  
423 differentiation within *Streptococcus pneumoniae*. BMC Microbiol. 9, 191. doi:10.1186/1471-  
424 2180-9-191
- 425 Chancey, S.T., Agrawal, S., Schroeder, M.R., Farley, M.M., Tettelin, H.H., Stephens, D.S., 2015.  
426 Composite mobile genetic elements disseminating macrolide resistance in *Streptococcus*  
427 *pneumoniae*. Front. Microbiol. 6, 1–14. doi:10.3389/fmicb.2015.00026
- 428 Cheng, L., Connor, T.R., Sirén, J., Aanensen, D.M., Corander, J., 2013. Hierarchical and spatially  
429 explicit clustering of DNA sequences with BAPS software. Mol. Biol. Evol. 30, 1224–1228.  
430 doi:10.1093/molbev/mst028
- 431 Chewapreecha, C., Harris, S.R., Croucher, N.J., Turner, C., Marttinen, P., Cheng, L., Pessia, A.,  
432 Aanensen, D.M., Mather, A.E., Page, A.J., Salter, S.J., Harris, D., Nosten, F., Goldblatt, D.,  
433 Corander, J., Parkhill, J., Turner, P., Bentley, S.D., 2014. Dense genomic sampling identifies  
434 highways of pneumococcal recombination. Nat. Genet. 46, 305–9. doi:10.1038/ng.2895
- 435 Claverys, J.-P., Håvarstein, L.S., 2007. Cannibalism and fratricide: mechanisms and raisons d'être.  
436 Nat. Rev. Microbiol. 5, 219–229. doi:10.1038/nrmicro1613
- 437 Claverys, J.-P., Prudhomme, M., Martin, B., 2006. Induction of competence regulons as a general  
438 response to stress in Gram-positive bacteria. Annu. Rev. Microbiol. 60, 451–475.  
439 doi:10.1146/annurev.micro.60.080805.142139
- 440 Cornejo, O.E., McGee, L., Rozen, D.E., 2010. Polymorphic competence peptides do not restrict  
441 recombination in *Streptococcus pneumoniae*. Mol. Biol. Evol. 27, 694–702.  
442 doi:10.1093/molbev/msp287
- 443 Croucher, N.J., Chewapreecha, C., Hanage, W.P., Harris, S.R., McGee, L., van der Linden, M., Song,  
444 J.-H., Ko, K.S., de Lencastre, H., Turner, C., Yang, F., Sá-Leão, R., Beall, B., Klugman, K.P.,  
445 Parkhill, J., Turner, P., Bentley, S.D., 2014a. Evidence for soft selective sweeps in the evolution  
446 of pneumococcal multidrug resistance and vaccine escape. Genome Biol. Evol. 6, 1589–602.  
447 doi:10.1093/gbe/evu120
- 448 Croucher, N.J., Finkelstein, J. a, Pelton, S.I., Mitchell, P.K., Lee, G.M., Parkhill, J., Bentley, S.D.,  
449 Hanage, W.P., Lipsitch, M., 2013a. Population genomics of post-vaccine changes in  
450 pneumococcal epidemiology. Nat. Genet. 45, 656–63. doi:10.1038/ng.2625
- 451 Croucher, N.J., Finkelstein, J.A., Pelton, S.I., Mitchell, P.K., Lee, G.M., Parkhill, J., Bentley, S.D.,  
452 Hanage, W.P., Lipsitch, M., 2013b. Population genomics of post-vaccine changes in  
453 pneumococcal epidemiology. Nat. Genet. 45, 656–63. doi:10.1038/ng.2625
- 454 Croucher, N.J., Hanage, W.P., Harris, S.R., McGee, L., van der Linden, M., de Lencastre, H., Sá-  
455 Leão, R., Song, J.-H., Ko, K.S., Beall, B., Others, 2014b. Variable recombination dynamics  
456 during the emergence, transmission and 'disarming' of a multidrug-resistant pneumococcal clone.  
457 BMC Biol. 12, 49. doi:10.1186/1741-7007-12-49
- 458 Croucher, N.J., Harris, S.R., Fraser, C., Quail, M. a, Burton, J., van der Linden, M., McGee, L., von  
459 Gottberg, A., Song, J.H., Ko, K.S., Pichon, B., Baker, S., Parry, C.M., Lambertsen, L.M.,  
460 Shahinas, D., Pillai, D.R., Mitchell, T.J., Dougan, G., Tomasz, A., Klugman, K.P., Parkhill, J.,  
461 Hanage, W.P., Bentley, S.D., 2011. Rapid pneumococcal evolution in response to clinical  
462 interventions. Science 331, 430–434. doi:10.1126/science.1198545
- 463 Croucher, N.J., Mitchell, A.M., Gould, K. a., Inverarity, D., Barquist, L., Feltwell, T., Fookes, M.C.,  
464 Harris, S.R., Dordel, J., Salter, S.J., Browall, S., Zemlickova, H., Parkhill, J., Normark, S.,

- 465 Henriques-Normark, B., Hinds, J., Mitchell, T.J., Bentley, S.D., 2013c. Dominant role of  
466 nucleotide substitution in the diversification of serotype 3 pneumococci over decades and during  
467 a single infection. *PLoS Genet.* 9. doi:10.1371/journal.pgen.1003868
- 468 Croucher, N.J., Page, A.J., Connor, T.R., Delaney, A.J., Keane, J.A., Bentley, S.D., Parkhill, J.,  
469 Harris, S.R., 2015. Rapid phylogenetic analysis of large samples of recombinant bacterial whole  
470 genome sequences using Gubbins. *Nucleic Acids Res.* 43, e15–e15. doi:10.1093/nar/gku1196
- 471 Darriba, D., Taboada, G.L., Doallo, R., Posada, D., 2012. jModelTest 2: more models, new heuristics  
472 and parallel computing. *Nat. Methods* 9, 772–772. doi:10.1038/nmeth.2109
- 473 Duesberg, C.B., Malhotra-Kumar, S., Goossens, H., McGee, L., Klugman, K.P., Welte, T., Pletz,  
474 M.W.R., 2008. Interspecies recombination occurs frequently in quinolone resistance-determining  
475 regions of clinical isolates of *Streptococcus pyogenes*. *Antimicrob. Agents Chemother.* 52,  
476 4191–3. doi:10.1128/AAC.00518-08
- 477 Edgar, R.C., 2004. MUSCLE: Multiple sequence alignment with high accuracy and high throughput.  
478 *Nucleic Acids Res.* 32, 1792–1797. doi:10.1093/nar/gkh340
- 479 Evans, B.A., Rozen, D.E., 2013. Significant variation in transformation frequency in *Streptococcus*  
480 *pneumoniae*. *ISME J.* 7, 791–9. doi:10.1038/ismej.2012.170
- 481 Gao, Z., Przeworski, M., Sella, G., 2015. Footprints of ancient-balanced polymorphisms in genetic  
482 variation data from closely related species. *Evolution* 69, 431–46. doi:10.1111/evo.12567
- 483 Håvarstein, L.S., Hakenbeck, R., Gaustad, P., 1997. Natural competence in the genus *Streptococcus*:  
484 Evidence that streptococci can change phenotype by interspecies recombinational exchanges. *J.*  
485 *Bacteriol.* 179, 6589–6594.
- 486 Håvarstein, L.S., Martin, B., Johnsborg, O., Granadel, C., Claverys, J.P., 2006. New insights into the  
487 pneumococcal fratricide: Relationship to clumping and identification of a novel immunity factor.  
488 *Mol. Microbiol.* 59, 1297–1307. doi:10.1111/j.1365-2958.2005.05021.x
- 489 Holm, S., 1979. A simple sequentially rejective multiple test procedure. *Scand. J. Stat.* 6, 65–70.  
490 doi:10.2307/4615733
- 491 Hoskins, J., Alborn, W.E., Arnold, J., Blaszczyk, L.C., Burgett, S., Estrem, S.T., Fritz, L., Fu, D.,  
492 Fuller, W., Geringer, C., Gilmour, R., Glass, J.S., Khoja, H., Kraft, A.R., Lagace, R.E., Lee,  
493 L.N., Lefkowitz, E.J., Lu, J.I.N., Matsushima, P., Mundy, C.W., Nicas, T.I., Norris, F.H., Peery,  
494 R.B., Robertson, G.T., Rockey, P., Sun, P., Winkler, M.E., Yang, Y., Young-bellido, M., Zhao,  
495 G., Zook, C. a, Baltz, R.H., Jaskunas, R., Rosteck, P.R., Skatrud, P.L., Glass, J.I., States, U.,  
496 2001. Genome of the bacterium *Streptococcus pneumoniae* strain R6. *J. Bacteriol.* 183, 5709–  
497 5717. doi:10.1128/JB.183.19.5709
- 498 Huelsenbeck, J.P., Ronquist, F., 2001. MRBAYES: Bayesian inference of phylogenetic trees.  
499 *Bioinformatics* 17, 754–755. doi:10.1093/bioinformatics/17.8.754
- 500 Iannelli, F., Oggioni, M.R., Pozzi, G., 2005. Sensor domain of histidine kinase ComD confers  
501 competence phenotype specificity in *Streptococcus pneumoniae*. *FEMS Microbiol. Lett.* 252,  
502 321–326. doi:10.1016/j.femsle.2005.09.008
- 503 Johnsborg, O., Eldholm, V., Bjørnstad, M.L., Håvarstein, L.S., 2008. A predatory mechanism  
504 dramatically increases the efficiency of lateral gene transfer in *Streptococcus pneumoniae* and  
505 related commensal species. *Mol. Microbiol.* 69, 245–253. doi:10.1111/j.1365-  
506 2958.2008.06288.x
- 507 Kearse, M., Moir, R., Wilson, A., Stones-Havas, S., Cheung, M., Sturrock, S., Buxton, S., Cooper, A.,  
508 Markowitz, S., Duran, C., Thierer, T., Ashton, B., Meintjes, P., Drummond, A., 2012. Geneious  
509 Basic: An integrated and extendable desktop software platform for the organization and analysis  
510 of sequence data. *Bioinformatics* 28, 1647–1649. doi:10.1093/bioinformatics/bts199
- 511 King, S.J., Whatmore, A.M., Dowson, C.G., 2005. NanA, a neuraminidase from *Streptococcus*  
512 *pneumoniae*, shows high levels of sequence diversity, at least in part through recombination with  
513 *Streptococcus oralis*. *J. Bacteriol.* 187, 5376–5386. doi:10.1128/JB.187.15.5376
- 514 Kozlov, A.M., Aberer, A.J., Stamatakis, A., 2015. ExaML version 3: a tool for phylogenomic analyses  
515 on supercomputers. *Bioinformatics* 31, 2577–2579. doi:10.1093/bioinformatics/btv184
- 516 McGee, L., McDougal, L., Zhou, J., Spratt, B.G., Tenover, F.C., George, R., Hakenbeck, R.,  
517 Hryniewicz, W., Lefèvre, J.C., Tomasz, A., Klugman, K.P., 2001. Nomenclature of major  
518 antimicrobial-resistant clones of *Streptococcus pneumoniae* defined by the pneumococcal  
519 molecular epidemiology network. *J. Clin. Microbiol.* 39, 2565–2571.

520 doi:10.1128/JCM.39.7.2565-2571.2001  
521 Miller, E.L., Abrudan, M.I., Roberts, I.S., Rozen, D.E., 2016. Diverse ecological strategies are  
522 encoded by *Streptococcus pneumoniae* bacteriocin-like peptides. *Genome Biol. Evol.* 8, 1072–  
523 1090. doi:10.1093/gbe/evw055  
524 Mostowy, R., Croucher, N.J., Hanage, W.P., Harris, S.R., Bentley, S., Fraser, C., 2014. Heterogeneity  
525 in the frequency and characteristics of homologous recombination in pneumococcal evolution.  
526 *PLoS Genet.* 10, 1–15. doi:10.1371/journal.pgen.1004300  
527 O'Brien, K.L., Wolfson, L.J., Watt, J.P., Henkle, E., Deloria-Knoll, M., McCall, N., Lee, E.,  
528 Mulholland, K., Levine, O.S., Cherian, T., 2009. Burden of disease caused by *Streptococcus*  
529 *pneumoniae* in children younger than 5 years: global estimates. *Lancet* 374, 893–902. doi:S0140-  
530 6736(09)61204-6 [pii]r10.1016/S0140-6736(09)61204-6 [doi]  
531 Pestova, E. V, Håvarstein, L.S., Morrison, D. a, 1996. Regulation of competence for genetic  
532 transformation in *Streptococcus pneumoniae* by an auto-induced peptide pheromone and a two-  
533 component regulatory system. *Mol. Microbiol.* 21, 853–862. doi:10.1046/j.1365-  
534 2958.1996.501417.x  
535 Pozzi, G., Masala, L., Iannelli, F., Manganelli, R., Håvarstein, L.S., Piccoli, L., Simon, D., Morrison,  
536 D.A., 1996. Competence for genetic transformation in encapsulated strains of *Streptococcus*  
537 *pneumoniae*: two allelic variants of the peptide pheromone. *J. Bacteriol.* 178, 6087–6090.  
538 R Core Team, 2013. R: A Language and Environment for Statistical Computing.  
539 Ronquist, F., Huelsenbeck, J.P., 2003. MrBayes 3: Bayesian phylogenetic inference under mixed  
540 models. *Bioinformatics* 19, 1572–1574. doi:10.1093/bioinformatics/btg180  
541 Sawyer, S. A. 1999. GENECONV: A computer package for the statistical detection of gene  
542 conversion. Distributed by the author, Department of Mathematics, Washington University in St.  
543 Louis, available at <http://www.math.wustl.edu/~sawyer>.  
544 Ségurel, L., Thompson, E.E., Flutre, T., Lovstad, J., Venkat, A., Susan, W., Moyse, J., Ross, S.,  
545 Gamble, K., Sella, G., 2013. Correction for Segurel et al., The ABO blood group is a trans-  
546 species polymorphism in primates. *Proc. Natl. Acad. Sci.* 110, 6607–6607.  
547 doi:10.1073/pnas.1304029110  
548 Stamatakis, A., 2006. RAxML-VI-HPC: maximum likelihood-based phylogenetic analyses with  
549 thousands of taxa and mixed models. *Bioinformatics* 22, 2688–2690.  
550 doi:10.1093/bioinformatics/btl446  
551 Suchard, M.A., Redelings, B.D., 2006. BAli-Phy: simultaneous Bayesian inference of alignment and  
552 phylogeny. *Bioinformatics* 22, 2047–2048. doi:10.1093/bioinformatics/btl175  
553 Tortosa, P., Dubnau, D., 1999. Competence for transformation: A matter of taste. *Curr. Opin.*  
554 *Microbiol.* 2, 588–592. doi:10.1016/S1369-5274(99)00026-0  
555 Whatmore, A.M., Barcus, V. a, Christopher, G., Dowson, C.G., 1999. Genetic diversity of the  
556 *Streptococcal* competence (*com*) gene locus. *J. Bacteriol.* 181, 3144–3154.  
557

558 **Table 1.** Frequencies of pherotypes within geographic sites.

| Pherotype          | Secreted Peptide          | Maela,<br>Thailand | Atlanta,<br>USA | Mass.,<br>USA | Rotterdam,<br>The Netherlands | All 4,089<br>Genomes |
|--------------------|---------------------------|--------------------|-----------------|---------------|-------------------------------|----------------------|
| Csp-1              | EMRLSKFFRDFILQRKK         | 0.736              | 0.702           | 0.643         | 0.634                         | 0.720                |
| Csp-1_Short        | EMRLSKFFRDFIL             | 0.029              | 0               | 0             | 0                             | 0.021                |
| Csp-2              | EMRISRIILDFLFLRKK         | 0.213              | 0.24            | 0.333         | 0.324                         | 0.235                |
| Csp-4_1R           | EMRKMNEKSFNIFNFF-----RRR  | 0.005              | 0               | 0.003         | 0                             | 0.004                |
| Csp-4_2R           | EMRKMNEKSFNIFNFFNFF---RRR | 0.004              | 0.008           | 0.018         | 0.035                         | 0.007                |
| Csp-4_3R           | EMRKMNEKSFNIFNFFNFFNFFRRR | 0.005              | 0               | 0.002         | 0                             | 0.004                |
| Other <sup>a</sup> | —                         | 0.007              | 0.017           | 0.002         | 0.007                         | 0.007                |
| None               | —                         | 0.002              | 0.033           | 0             | 0                             | 0.003                |

<sup>a</sup>Other pherotypes each found in less than 0.2% of genomes, as well as two genomes of both Csp-1 and Csp-2 pherotype.

559

560

561 **Figure 1.** Associations between ComC and *comD*.

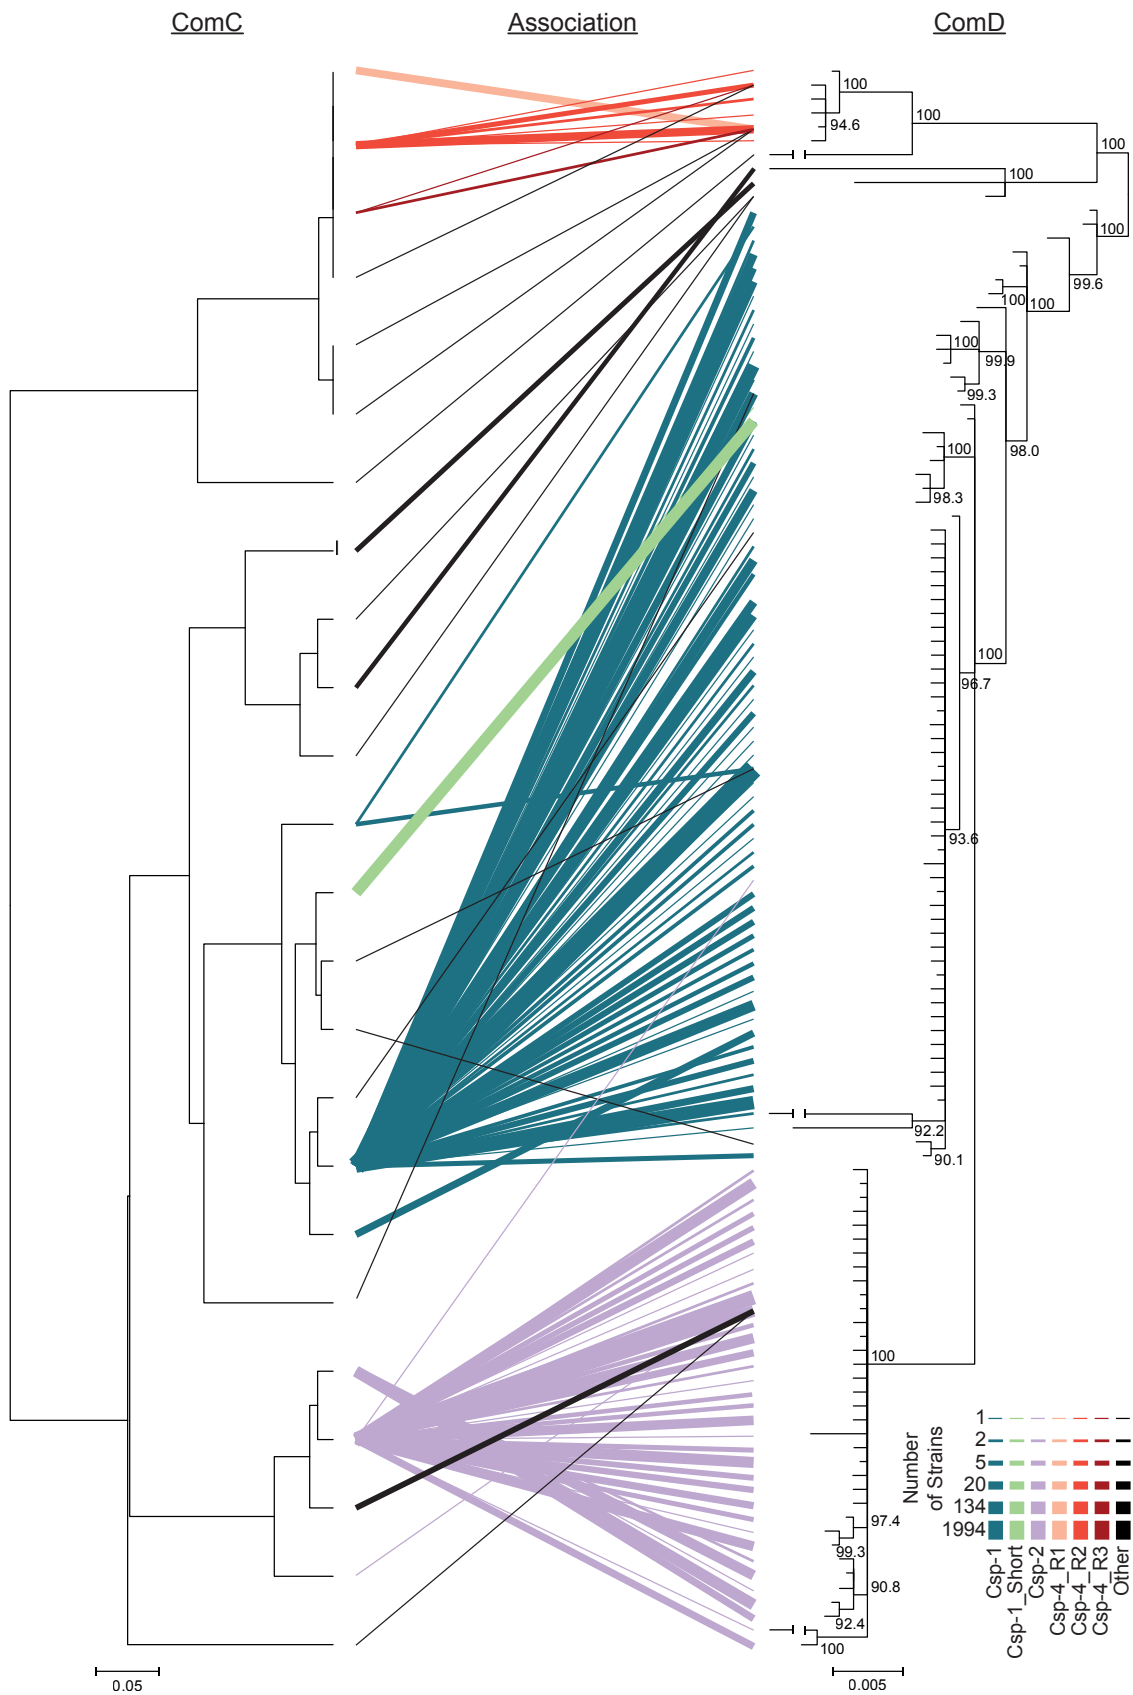

562

563

564 **Figure 2.** Phylogenetic relationship between *S. pneumoniae* genomes.

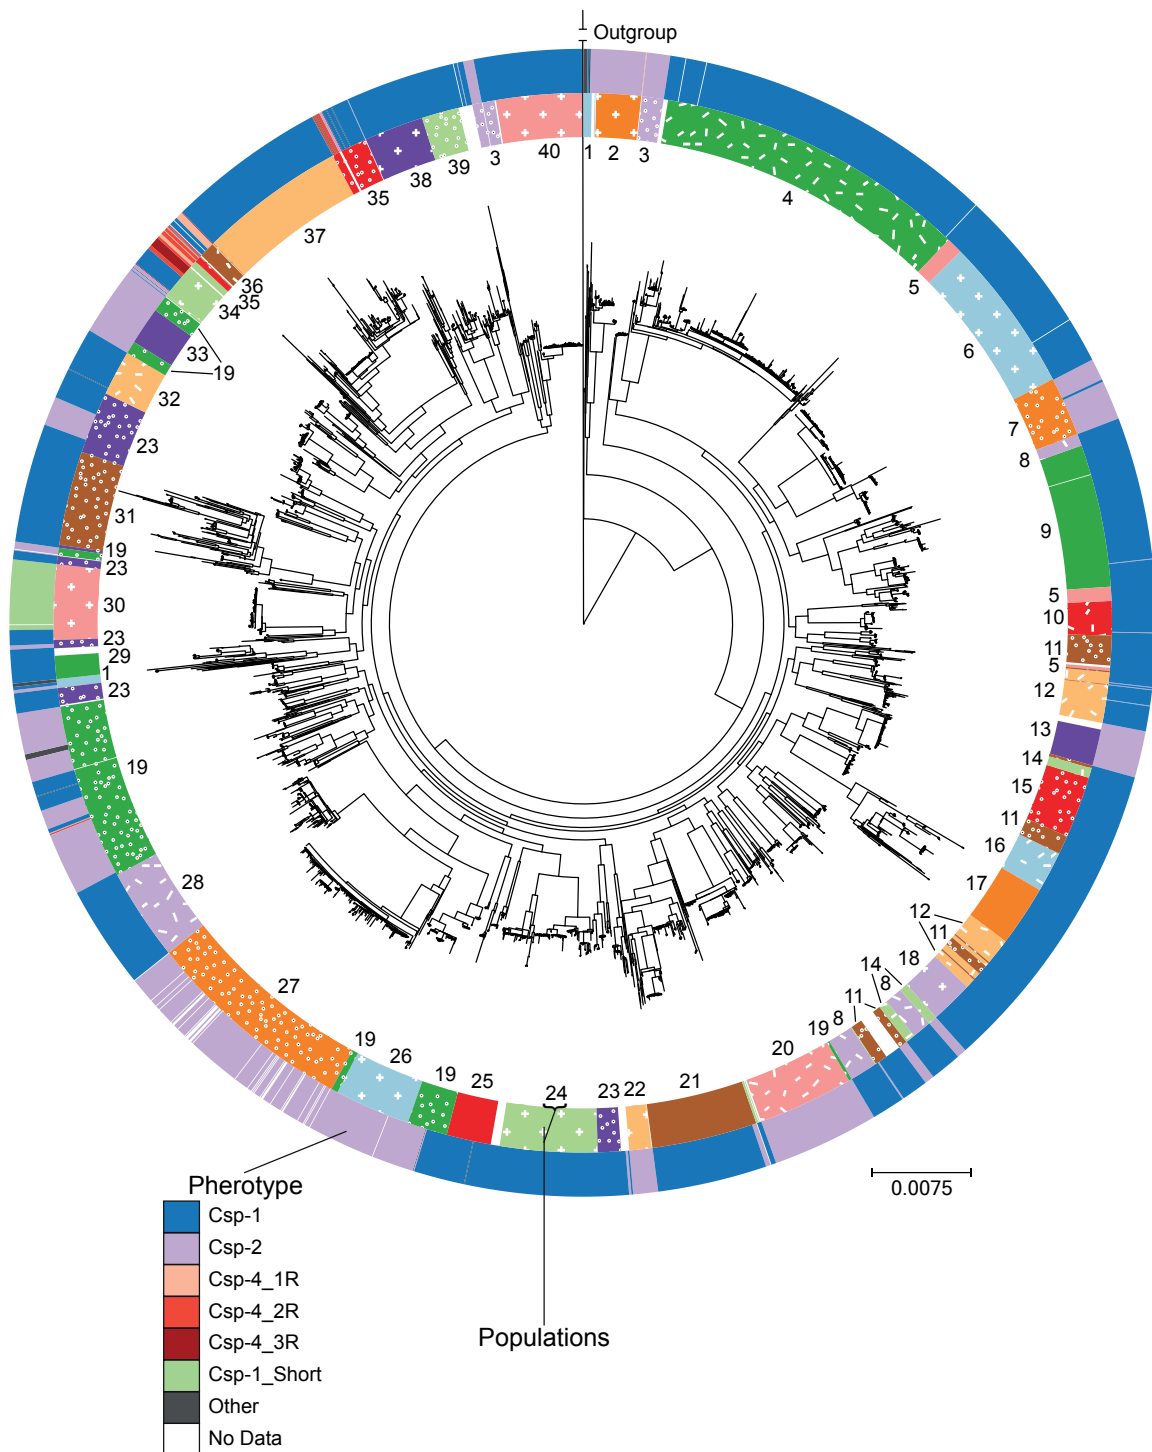

565

566



567 **Figure 3.** Relationship between phenotypes and populations.

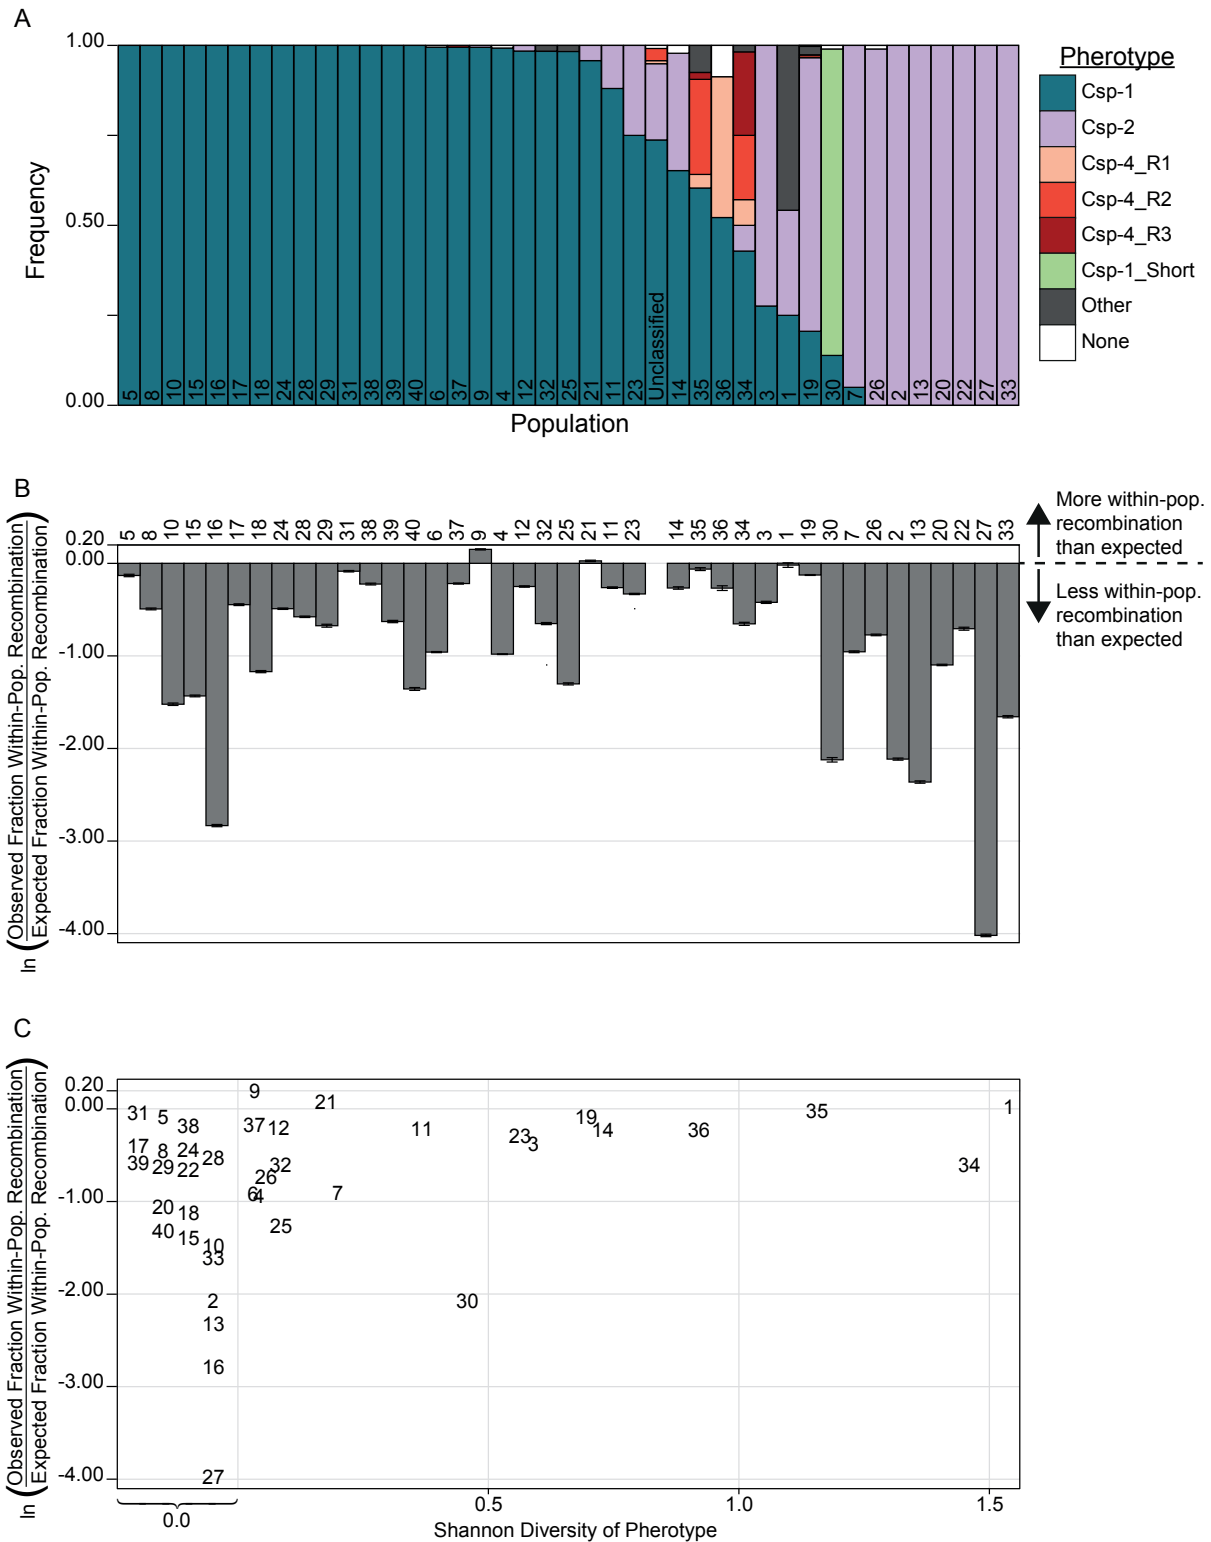

568

569

570 **Figure 4.** Recombination between and within phenotypes.

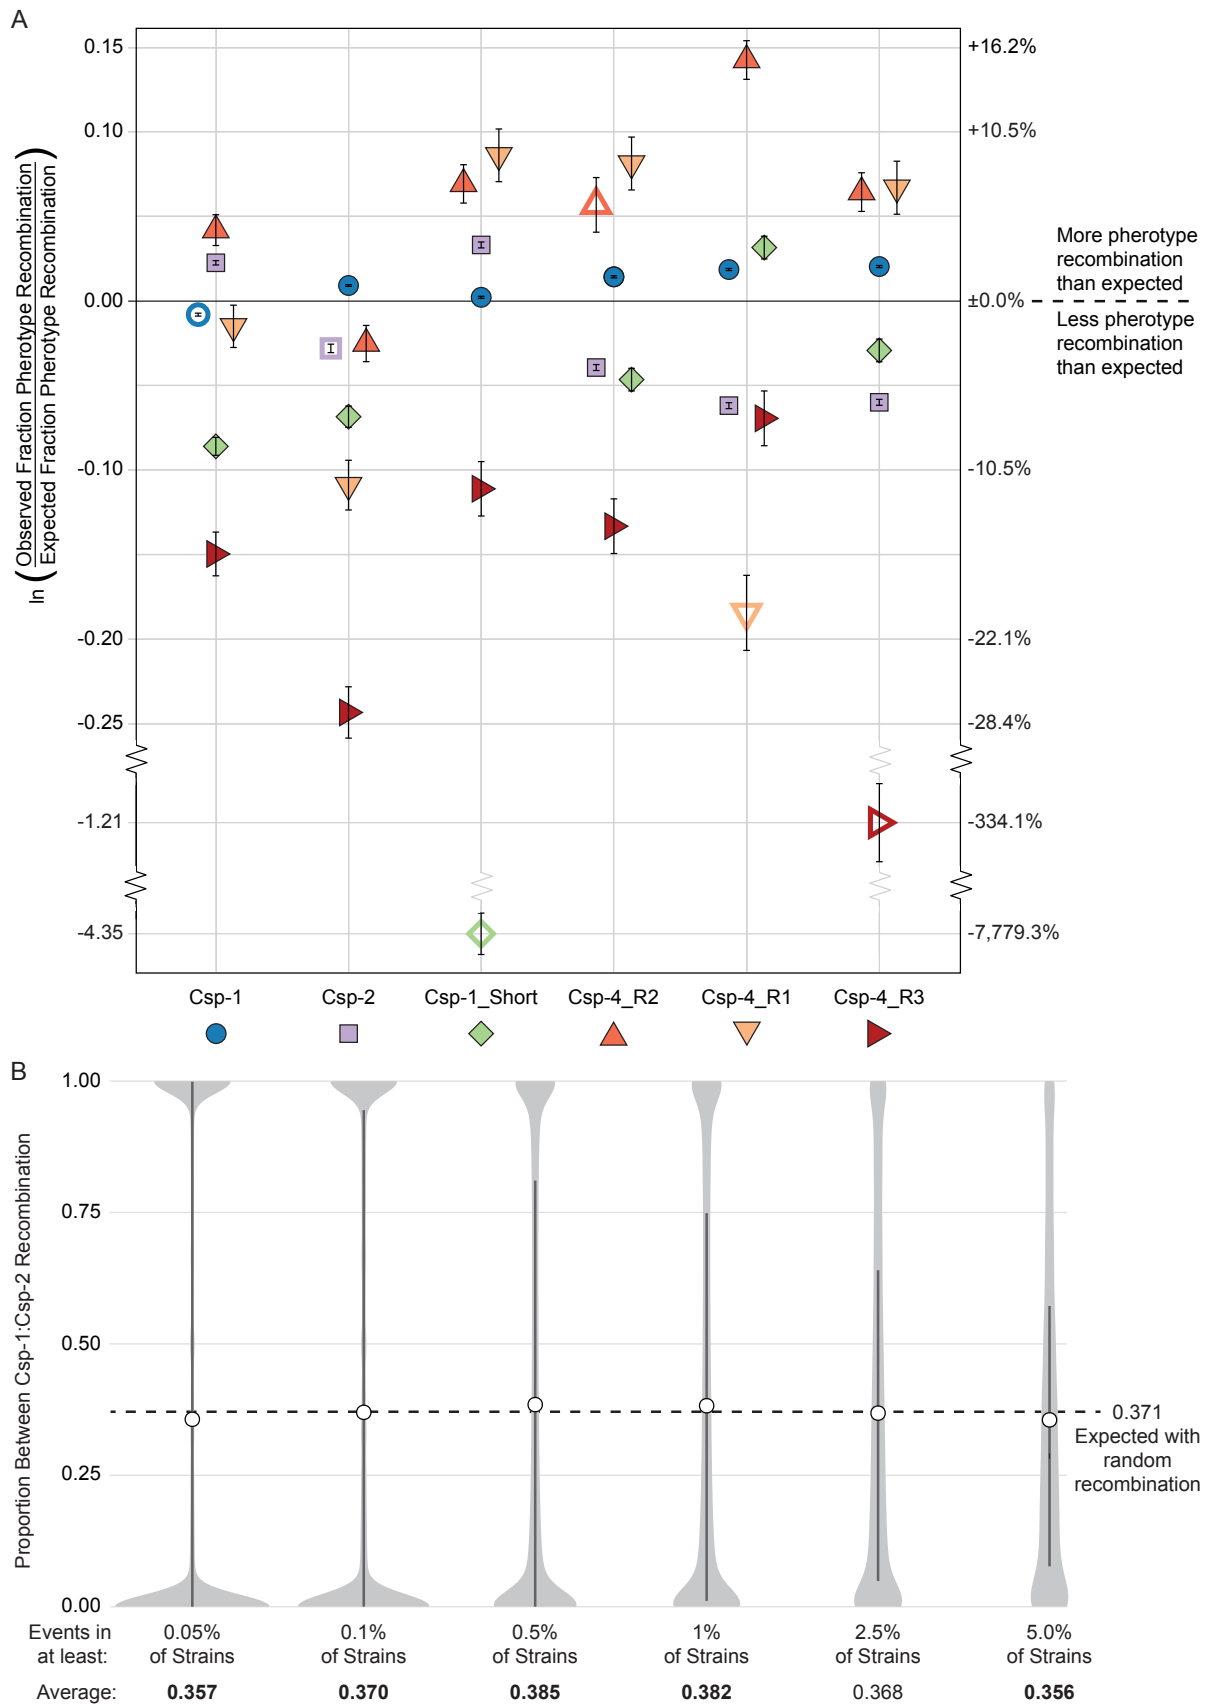

571  
572



573 **Figure Legends**

574 **Fig. 1.** Associations between ComC and *comD*. The UPGMA clustering of ComC genes is shown next  
575 to the inferred phylogenetic relationship between *comD* alleles. ComC amino acid variants and *comD*  
576 nucleotide alleles found within the same genome are shown as lines connecting the two phylograms,  
577 with thicker lines showing associations found in more strains. Line thickness is on a log scale.  
578 Classification of *comD* alleles is based on co-occurring CSPs within genomes, with a 99.8%  
579 correlation for the Csp-1 *comD* group, 99.2% correlation for the Csp-2 *comD* group, and 95.3%  
580 correlation for the Csp-4 *comD* group.

581  
582 **Fig. 2.** Phylogenetic relationship between *S. pneumoniae* genomes. The inner coloured ring shows the  
583 population grouping of strains as determined by hierBAPS, shown as a number and a colour/pattern.  
584 Genomes not classified into a population are white in the inner ring. The outer ring denotes phenotype.  
585

586 **Fig. 3.** Relationship between phenotypes and populations. A) Distribution of phenotypes within each  
587 population. B) Observed / expected fraction of within-population recombination for each population,  
588 with values below zero indicating less observed within-population recombination than expected. Error  
589 bars show 95% confidence intervals. C) The same recombination ratio as part B with populations'  
590 Shannon diversity of phenotypes, with populations shown as numbers.

591  
592 **Fig. 4.** Recombination between and within phenotypes. A) Observed / expected fraction of  
593 recombination within and between phenotypes. Empty shapes are within-phenotype comparisons,  
594 while filled shapes show between-phenotype comparisons. Colours correspond to phenotypes as in  
595 Figure 1. Error bars show 95% confidence intervals. B) Distribution of the proportion of  
596 recombination events between Csp-1 and Csp-2, in which all recombination events with identical  
597 break points in the full-genome alignment are grouped as a single event. Light grey shapes show  
598 density estimate; dark bars incorporate the 25<sup>th</sup> to 75<sup>th</sup> percentile; white circles indicate the average  
599 proportion. Averages in bold are significantly different from the null expectation.
